# Supplementary material for: Optimization of High Hydrostatic Pressure Treatments on Soybean Protein Isolate to Improve Its Functionality and Evaluation of Its Application in Yogurt
Source: PubMed Central journal article supplement (PMC8003865; doi:10.3390/foods10030667), 2021-03-20
Supplement: foods-10-00667-s001.pdf [file foods-10-00667-s001.pdf]

### Supplementary Materials:

Table S1 showed the coefficients of the models calculated using ANOVA analysis.

**Table S1.** Analysis of variance (ANOVA) for measured responses of SPI.

| Source                                                            | Sum of Squares | DF | Mean Square | F Value | P-Value (Prob >F) |
|-------------------------------------------------------------------|----------------|----|-------------|---------|-------------------|
| Analysis of variance (ANOVA) for water holding capacity (WHC)     |                |    |             |         |                   |
| Model                                                             | 4.05           | 9  | 0.45        | 19.79   | 0.0004 **         |
| X <sub>1</sub>                                                    | 1.40           | 1  | 0.084       | 3.69    | 0.0960            |
| X <sub>2</sub>                                                    | 0.21           | 1  | 1.40        | 61.66   | 0.0001 **         |
| X <sub>3</sub>                                                    | 0.084          | 1  | 0.21        | 9.14    | 0.0193 *          |
| X <sub>1</sub> X <sub>2</sub>                                     | 0.000100       | 1  | 0.000100    | 0.00439 | 0.9490            |
| X <sub>1</sub> X <sub>3</sub>                                     | 0.021          | 1  | 0.021       | 0.92    | 0.3684            |
| X <sub>2</sub> X <sub>3</sub>                                     | 0.35           | 1  | 0.35        | 15.56   | 0.0056 **         |
| X <sub>1</sub> <sup>2</sup>                                       | 0.44           | 1  | 0.44        | 19.49   | 0.0031 **         |
| X <sub>2</sub> <sup>2</sup>                                       | 0.46           | 1  | 0.46        | 20.09   | 0.0029 **         |
| X <sub>3</sub> <sup>2</sup>                                       | 0.88           | 1  | 0.88        | 38.65   | 0.0004 **         |
| Residual                                                          | 0.16           | 7  | 0.023       |         |                   |
| Lack of Fit                                                       | 0.12           | 3  | 0.041       | 4.61    | 0.0870            |
| Pure Error                                                        | 0.036          | 4  | 0.00893     |         |                   |
| Cor. Total                                                        | 4.21           | 16 |             |         |                   |
| Analysis of variance (ANOVA) for emulsifying activity index (EAI) |                |    |             |         |                   |
| Model                                                             | 252.18         | 9  | 28.02       | 11.51   | 0.0020 **         |
| X <sub>1</sub>                                                    | 82.50          | 1  | 82.50       | 33.88   | 0.0006 **         |
| X <sub>2</sub>                                                    | 0.20           | 1  | 0.20        | 0.081   | 0.7835            |
| X <sub>3</sub>                                                    | 2.17           | 1  | 2.17        | 0.89    | 0.3762            |
| X <sub>1</sub> X <sub>2</sub>                                     | 0.56           | 1  | 0.56        | 0.23    | 0.6454            |
| X <sub>1</sub> X <sub>3</sub>                                     | 3.12           | 1  | 3.12        | 1.28    | 0.2953            |
| X <sub>2</sub> X <sub>3</sub>                                     | 3.92           | 1  | 3.92        | 1.61    | 0.2450            |
| X <sub>1</sub> <sup>2</sup>                                       | 58.76          | 1  | 58.76       | 24.13   | 0.0017 **         |
| X <sub>2</sub> <sup>2</sup>                                       | 23.82          | 1  | 23.82       | 9.78    | 0.0167 **         |
| X <sub>3</sub> <sup>2</sup>                                       | 61.14          | 1  | 61.14       | 25.11   | 0.0015 **         |
| Residual                                                          | 17.04          | 7  | 2.43        |         |                   |
| Lack of Fit                                                       | 12.44          | 3  | 4.15        | 3.60    | 0.1239            |
| Pure Error                                                        | 4.61           | 4  | 1.15        |         |                   |
| Cor. Total                                                        | 269.22         | 16 |             |         |                   |
| Analysis of variance (ANOVA) for solubility                       |                |    |             |         |                   |
| Model                                                             | 0.080          | 9  | 0.00892     | 20.43   | 0.0003 **         |
| X <sub>1</sub>                                                    | 0.0000772      | 1  | 0.0000772   | 0.18    | 0.6867            |
| X <sub>2</sub>                                                    | 0.00178        | 1  | 0.00178     | 4.07    | 0.0835            |
| X <sub>3</sub>                                                    | 0.014          | 1  | 0.014       | 32.05   | 0.0008 **         |
| X <sub>1</sub> X <sub>2</sub>                                     | 0.0000210      | 1  | 0.0000210   | 0.048   | 0.8327            |
| X <sub>1</sub> X <sub>3</sub>                                     | 0.000516       | 1  | 0.000516    | 1.18    | 0.3131            |
| X <sub>2</sub> X <sub>3</sub>                                     | 0.00440        | 1  | 0.00440     | 10.08   | 0.0156 **         |
| X <sub>1</sub> <sup>2</sup>                                       | 0.034          | 1  | 0.034       | 78.91   | 0.0002 **         |
| X <sub>2</sub> <sup>2</sup>                                       | 0.00675        | 1  | 0.00675     | 15.45   | 0.0057 **         |
| X <sub>3</sub> <sup>2</sup>                                       | 0.013          | 1  | 0.013       | 29.48   | 0.0010 **         |
| Residual                                                          | 0.003.06       | 7  | 0.000437    |         |                   |
| Lack of Fit                                                       | 0.00203        | 3  | 0.000676    | 2.63    | 0.1867            |
| Pure Error                                                        | 0.00103        | 4  | 0.000257    |         |                   |
| Cor. Total                                                        | 0.083          | 16 |             |         |                   |

\* Significant at  $p < 0.05$ ; \*\* Significant at  $p < 0.0001$ .
